# Supplementary material
Source: PubMed Central journal article supplement (PMC10722560)
Supplement: NIHMS1944496-supplement-2.pdf [file NIHMS1944496-supplement-2.pdf]

**Figure S1**

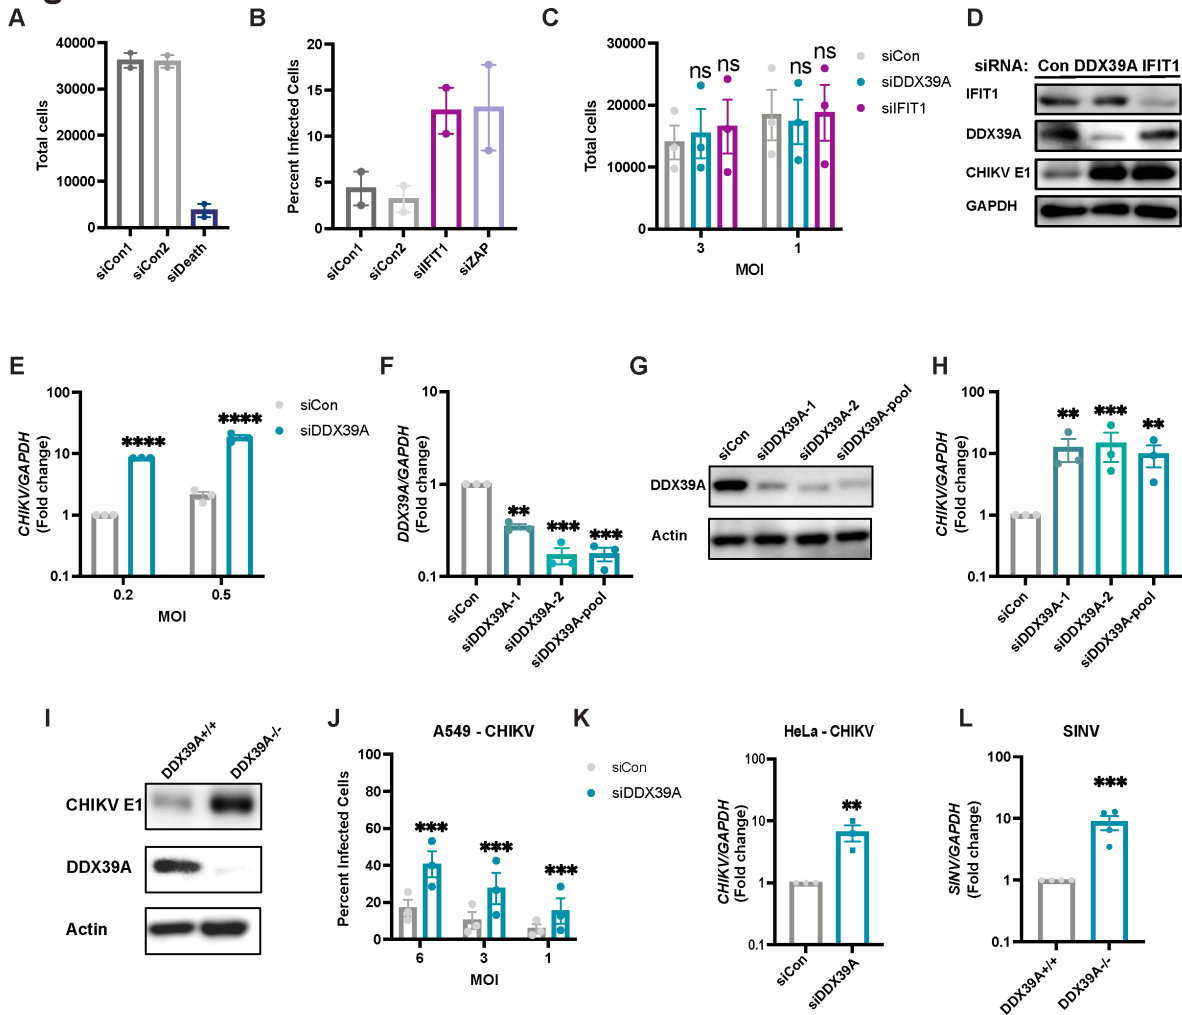

**Figure S1. DDX39A is antiviral against CHIKV, Related to Figure 1.**

(A-B) U2OS cells were transfected with scrambled siRNAs as negative controls (siCon1 and siCon2) and siRNAs against IFIT1 and ZAP as positive controls. siRNAs targeting anti-apoptotic genes (siDeath) were used for RNAi efficiency. Cells were infected (CHIKV Ross MOI 0.1, 24h), stained (nuclei, Hoechst 33342 and infection, anti-CHIKV), and imaged and analyzed with automated microscopy, n=2. (C) Control, DDX39A, and IFIT1-depleted cells were infected with CHIKV at the indicated MOIs. Cell viability was quantified (nuclei+) relative to negative siRNA controls using automated microscopy. (D) Transfected cells were infected with CHIKV (MOI 0.5), and lysates were probed for DDX39A and IFIT1 to confirm gene knockdown and for CHIKV E1 to assess infection. GAPDH was used as a loading control. n=2, representative image shown. (E) Control and DDX39A-depleted cells were infected with CHIKV at the indicated MOIs, and viral RNA was quantified by qPCR. (F-H) DDX39A was depleted using either two independent or pooled siRNAs followed by infection with CHIKV (MOI 0.5, 24h). (F) *DDX39A* mRNA and (G) viral RNA levels were measured by qPCR and (H) DDX39A protein levels were determined by immunoblot. (I) DDX39A<sup>-/-</sup> U2OS cells were generated using CRISPR/Cas9 and infected with CHIKV (MOI 0.1, 24h). DDX39A and CHIKV E1 viral protein levels were assessed by immunoblot. (J) Control and DDX39A-depleted A549 cells were infected with CHIKV at the indicated MOIs for

24h and infection was assessed by automated microscopy. (K) Control and DDX39A-depleted HeLa cells were infected with CHIKV (MOI 0.5, 24h), and viral RNA was quantified by qPCR. (L) *DDX39A*<sup>-/-</sup> U2OS were infected with SINV mKate (MOI 0.1, 24h), and SINV RNA was measured by qPCR. Data are presented as fold change vs. control cells in (E, F, H, K, L). Dots represent individual knockdown experiments, n=3 for all experiments unless otherwise indicated. *GAPDH* was used as a loading control gene for all qPCR experiments unless otherwise noted. Beta-Acting was used as a loading control for all immunoblots as indicated. Statistical analyses were performed using two-way ANOVA with Bonferroni corrections for multiple comparisons (C, E, J), one-way ANOVA with Bonferroni corrections for multiple comparisons (F, H), and Student's (unpaired, two-tailed) *t*-test (K, L). \*p<0.05, \*\*p<0.01, \*\*\*p<0.001, \*\*\*\*p<0.0001; error bars represent S.E.M.

**Figure S2**

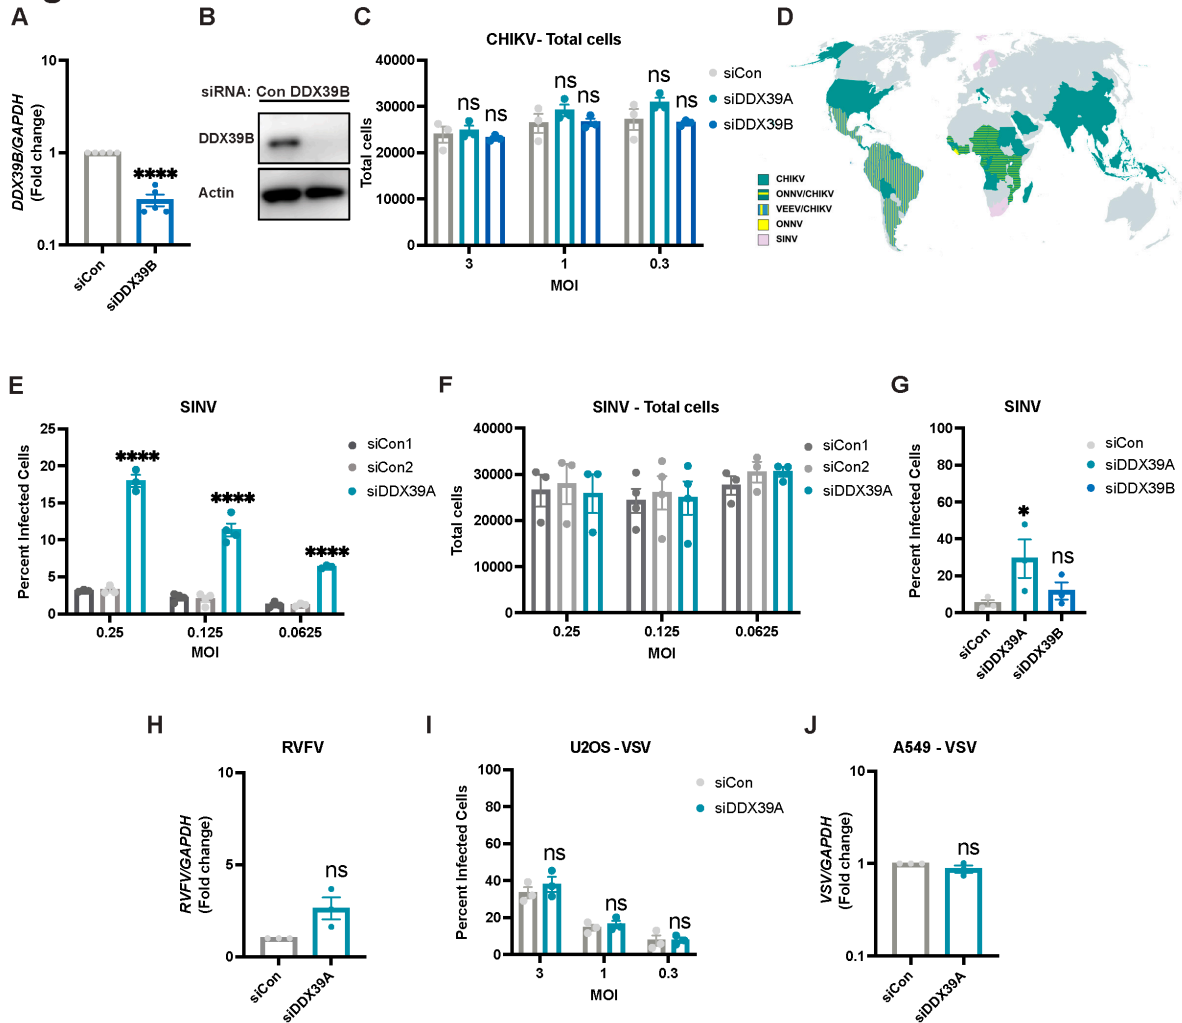

**Figure S2. DDX39A, but not DDX39B, is antiviral against alphaviruses, Related to Figure 1.**

(A-B) Knockdown of DDX39B in U2OS cells was assessed by (A) qPCR and by (B) immunoblot. (C) Control, DDX39A, and DDX39B-depleted U2OS cells infected with CHIKV at the indicated MOIs for 24h. Cell number was measured using Hoechst 33342 for nuclei and automated microscopy. (D) Global distribution of the alphaviruses used in this study. Generated with mapchart.net based on current literature<sup>1-4</sup>. (E-F) Control and DDX39A-depleted U2OS cells were infected with SINV-mKate at the indicated MOIs for 24h. Cells were stained (nuclei, Hoechst 33342), and imaged. (E) Percent infected cells and (F) total cells were calculated with automated microscopy. (G) DDX39A and DD39B-depleted U2OS cells were infected with SINV-mKate (MOI 0.5, 24h) and the percent infected cells were quantified by automated microscopy. (H-I) U2OS cells depleted of DDX39A were infected with (H) Rift Valley fever virus (RVFV, MOI 0.1, 24h) or (I) VSV-GFP at the indicated MOIs for 16h, and infection was assessed by (H) qPCR for viral RNA or by (I) immunofluorescence with automated microscopy. (J) A549 depleted of control or DDX39A were infected with VSV, and infection was assessed by qPCR. Dots represent individual knockdown experiments, n=3-5 for all experiments. Data are presented as fold change vs. control cells in (A, H, J). *GAPDH* was used as a loading control gene for all qPCR experiments unless

otherwise noted. Beta-Actin was used as a loading control for immunoblots. Statistical analyses were performed using two-way ANOVA with Bonferroni corrections for multiple comparisons (C, E, I), one-way ANOVA with Bonferroni corrections for multiple comparisons (G), and Student's (unpaired, two-tailed) *t*-test (A, H, J). \* $p < 0.05$ , \*\* $p < 0.01$ , \*\*\* $p < 0.001$ , \*\*\*\* $p < 0.0001$ ; error bars represent S.E.M.



## Figure S3

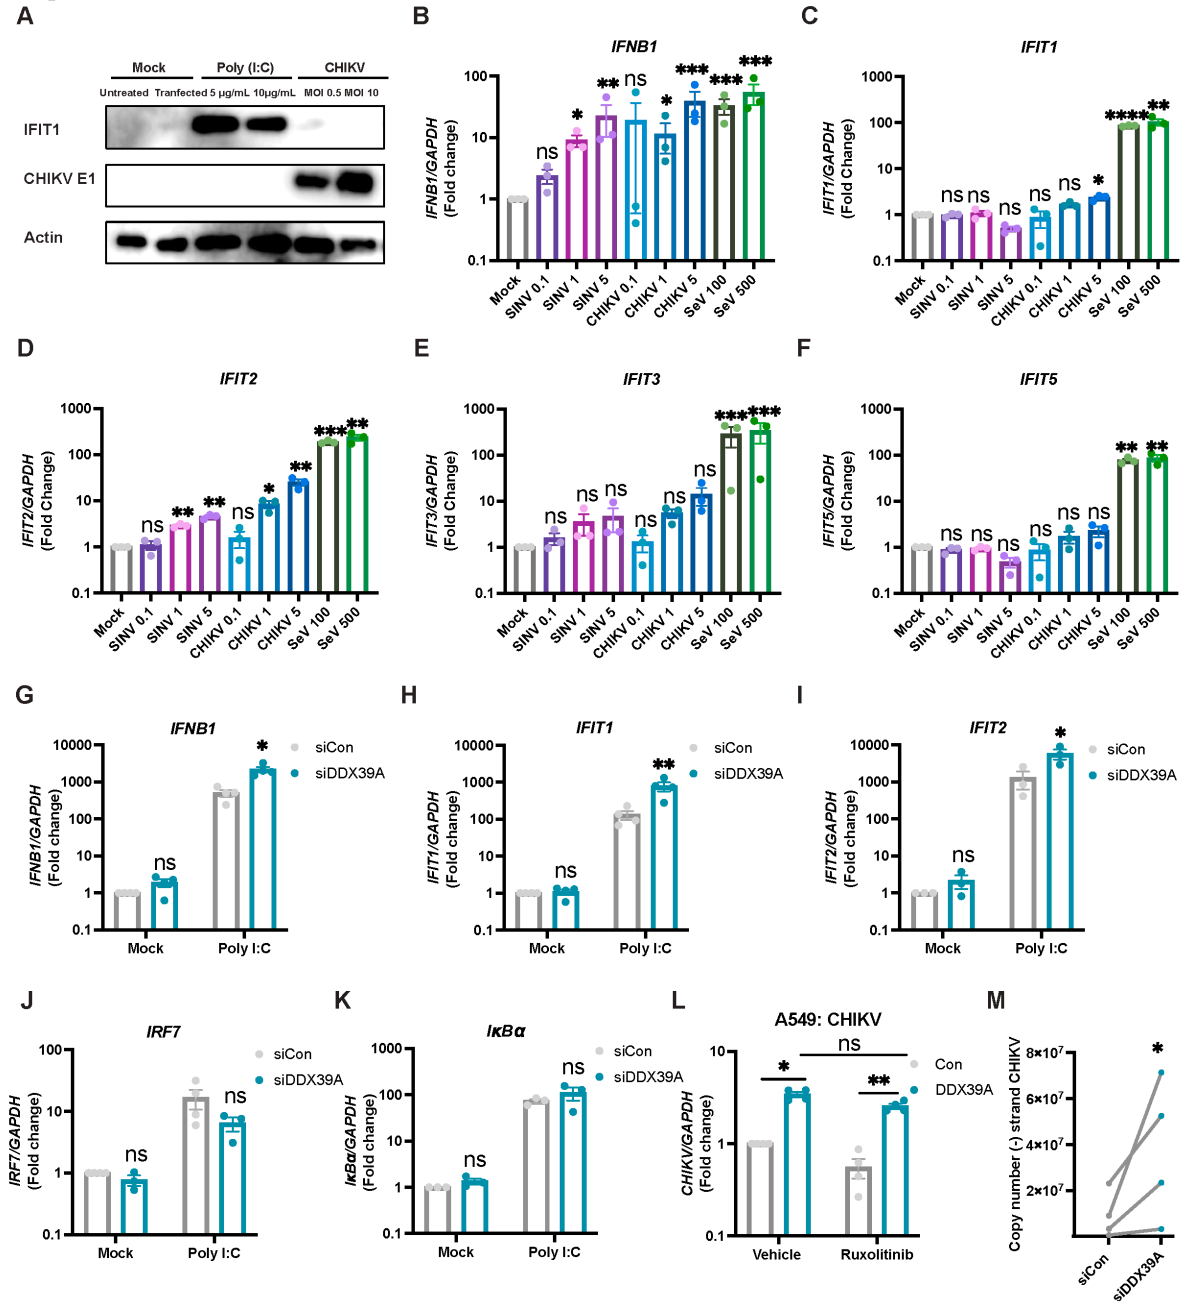

**Figure S3. DDX39A is not required for the induction of the IFN pathway, Related to Figures 2 and 3.**

(A) U2OS cells were mock transfected, stimulated with poly (I:C) at the indicated concentrations, and infected with CHIKV at the indicated MOIs. Viral and innate immune protein expression was assessed by immunoblot. Representative image shown. (B-F) U2OS cells were infected with SINV-mKate (MOIs 0.1,1,5), CHIKV (MOIs 0.1,1,3) or SeV (100 and 500 HAU/mL), and levels of *IFNB1* or the indicated ISGs were assessed by qPCR compared to mock uninfected cells. (G-L) U2OS cells depleted of control and DDX39A were transfected with either vehicle or poly (I:C) for 6-8h. Levels of (G) *IFNB1*, (H) *IFIT1*, (I) *IFIT2*, (J) *IRF7*, and (J) *Ikbα* transcript levels were

measured by qPCR. (L) Control or siRNA depleted-DDX39A A549 cells were pretreated with vehicle or Ruxolitinib (10  $\mu$ M) and infected with CHIKV (MOI 1, 24h). Levels of viral RNA were measured by qPCR. (M) (-) strand (antigenome) copy numbers were quantified using strand-specific RT-qPCR in control and DDX39A-depleted U2OS cells infected with CHIKV (MOI 20, 4h). *GAPDH* was used as a loading control gene for qPCRs in (B-K). Data are shown as fold change relative to mock siCon. Dots represent individual experiments, n=3-4 for all experiments. Beta-Actin was used as a loading control for immunoblots. Statistical analyses were performed using one-way ANOVA with Dunnett's correction for multiple comparisons (B-F), two-way ANOVA with Bonferroni corrections for multiple comparisons (G-K), paired t-test (M), and two-way ANOVA with Turkey's correction for multiple comparisons (L). \*p<0.05, \*\*p<0.01, \*\*\*p<0.001, \*\*\*\*p<0.0001; error bars represent S.E.M.

**Figure S4**

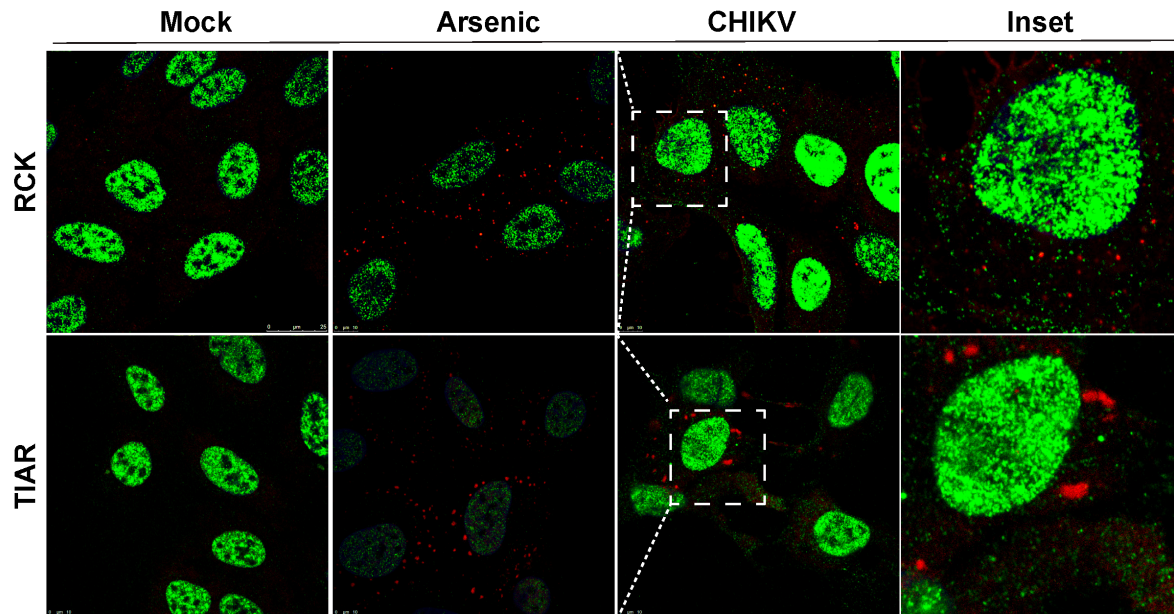

**Figure S4. DDX39A does not colocalize with RNA processing bodies, Related to Figure 3.** UO2S cells were infected with CHIKV- Ross (MOI5, 30h) or treated with arsenic for 30 minutes. Cells were then fixed, stained (anti-DDX39A in green and anti-RCK in red or TIAR in red, and nuclei, Hoechst 33342 in blue), and imaged with confocal microscopy, n=3. Scale bars shown.

**Figure S5**

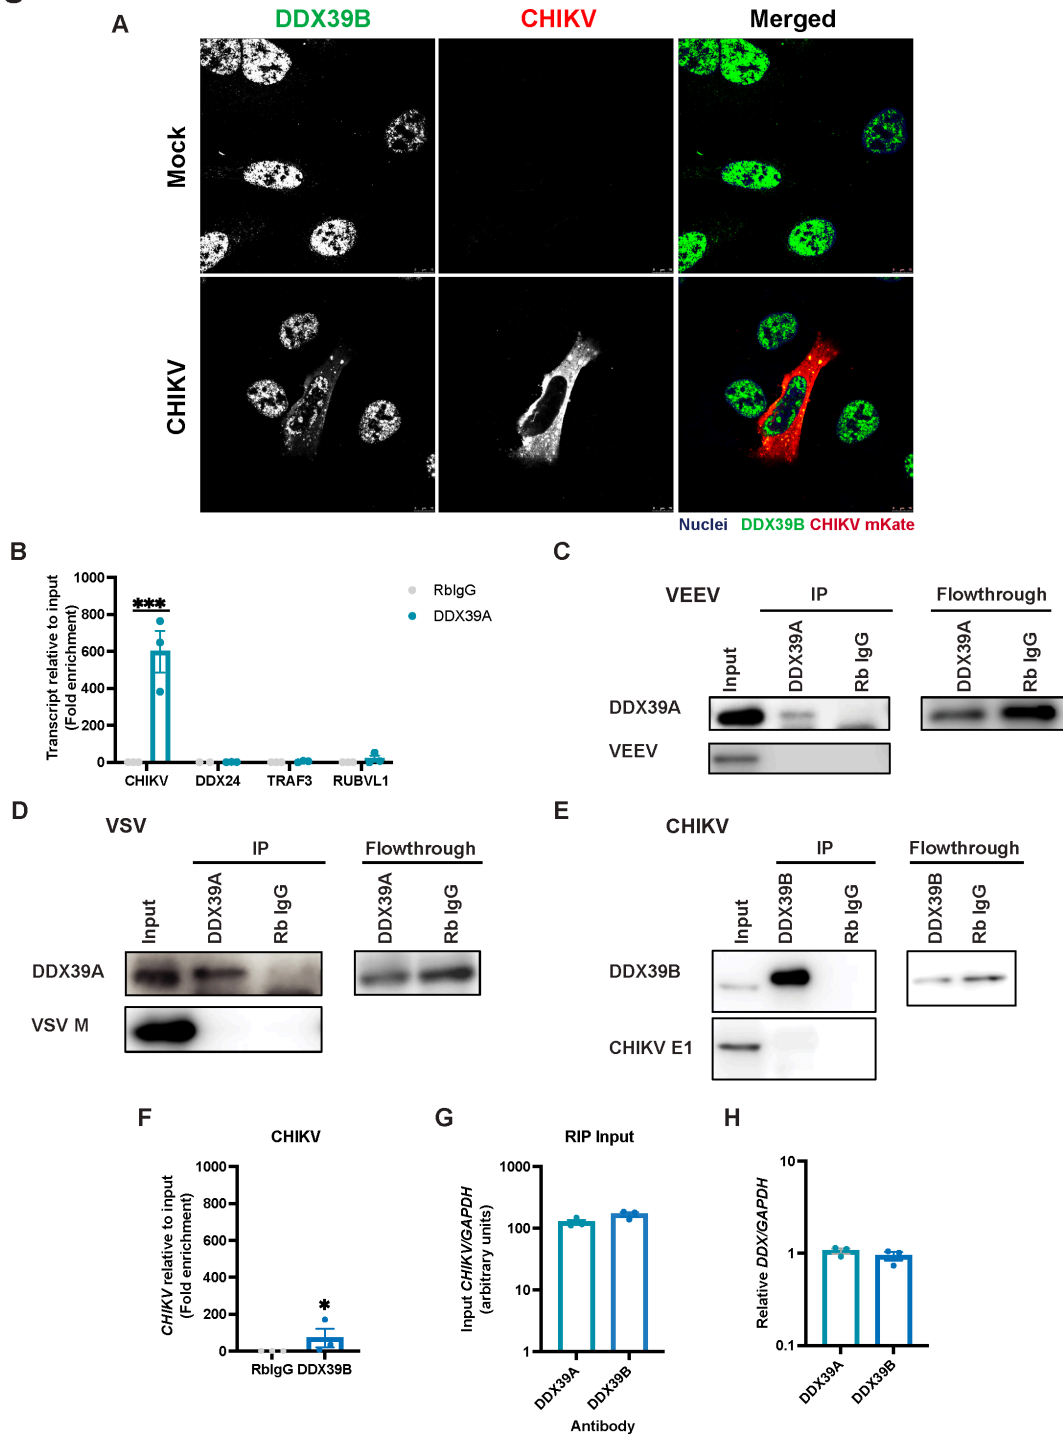

**Figure S5. Endogenous DDX39A or DDX39B is immunoprecipitated to assess RNA binding by RIP-qPCR, Related to Figure 5.**

(A) CHIKV-infected cells were stained with DDX39B (green) and Hoechst (nuclei, blue) at 20hpi. Representative images shown, n=3. Magnification 63x; Scale bar 10  $\mu$ m (B) CHIKV-infected U2OS cells were cross-linked at 20 hpi. Host genes or viral transcript associated with DDX39A or

with the rabbit IgG control were analyzed by qPCR. Enrichment was assessed relative to input. Data are shown fold change relative to the rabbit IgG control. (C) Endogenous DDX39A was immunoprecipitated for RIP-qPCR experiments upon infection with (C) VEEV and (D) VSV, representative immunoblots are shown. (E-F) Endogenous DDX39B was immunoprecipitated as shown by (E) immunoblot and (F) viral transcripts associated with DDX39B or the rabbit IgG control were analyzed by qPCR. (G) In RIP experiments done independently, CHIKV infection levels in inputs were assessed by qPCR. (H) Relative levels of DDX39A and DDX39B in U2OS were assessed by standard curve qPCR. Dots represent individual experiments, all experiments n=3. Statistical analyses were performed using one-way ANOVA with Bonferroni corrections (B), Student's (unpaired, two-tailed) *t*-test (F-H) \**p*<0.05, \*\**p*<0.01, \*\*\**p*<0.001, \*\*\*\**p*<0.0001; error bars represent S.E.M.

**Figure S6**

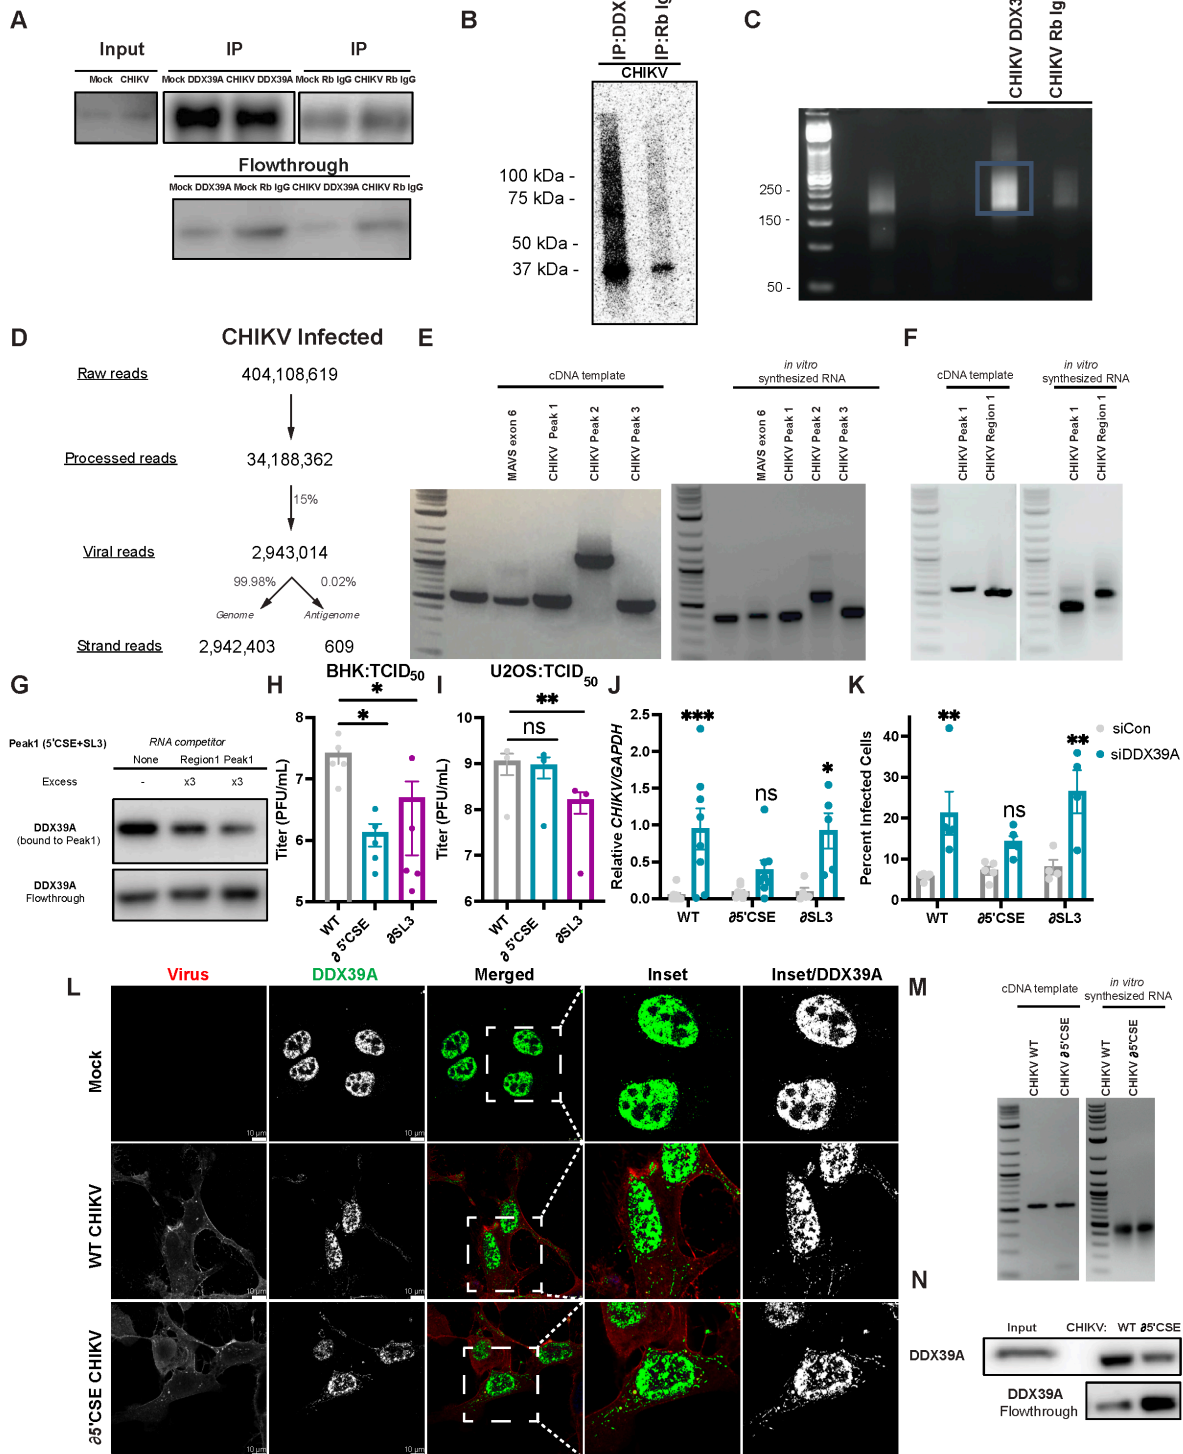

**Figure S6. Mapping DDX39A-CHIKV RNA interactions using CLIP-seq and RNA affinity experiments, Related to Figure 5.**

(A) Mock uninfected or CHIKV-infected cells were UV-crosslinked and immunoprecipitated with DDX39A or Rb IgG. Representative image of immunoblot. (B) After immunoprecipitation with

DDX39A or Rb IgG, samples were radiolabeled with  $^{32}\text{P}$ , and ran on an SDS-PAGE gel for size selection. Representative image is shown after scanning with a Typhoon imager. (C) A 5' RNA adapter with a degenerate barcode was ligated to the extracted RNA and samples were reversed transcribed and amplified by PCR using primers with specific indexes to allow for demultiplexing of samples following sequencing. Representative image of PCR fragments shown. (D) Total raw reads from CHIKV-infected cells were trimmed, collapsed and biological replicates merged and mapped to a composite genome composed of the full human genome (hg38) and of the CHIKV genomic sequence (Ross strain; GenBank accession no. AF490259.3). Unique read counts were retrieved for each strand using Samtools. (E) The indicated fragments were PCR-amplified to create templates for *in vitro* RNA synthesis and RNA affinity. (F-G) CHIKV Peak 1 and Region 1 fragments were synthesized for RNA affinity competition between the biotinylated Peak 1-bound to streptavidin beads and excess unbiotinylated Peak-1 or Region-1 fragments in the presence of cell lysate. (G) Levels of DDX39A bound to the biotinylated Peak-1 relative to the unbiotinylated competing RNAs are compared by immunoblot. (H-I) WT,  $\partial 5'$ CSE, or the  $\partial$ SL3 were serially diluted and added to (H) BHK and (I) U2OS cells for 24h, and titer levels were assessed by TCID<sub>50</sub>. (J-K) Control and DDX39A-depleted U2OS cells were infected with WT,  $\partial 5'$ CSE or the  $\partial$ SL3 strains of CHIKV for 24h, and viral levels were assessed by (J) qPCR and by (K) automated microscopy. (L) Mock uninfected or U2OS cells infected with WT and  $\partial 5'$ CSE CHIKV (MOI 0.5, 20h) were fixed, stained (anti-DDX39A in green, anti-CHIKV in red, and nuclei, Hoechst 33342 in blue), and imaged with confocal microscopy, n=2. (M) Templates were created from purified WT and  $\partial 5'$ CSE viruses for *in vitro* synthesis and then biotinylated. (N) WT and  $\partial 5'$ CSE biotinylated RNAs were bound to streptavidin beads, incubated with lysate at 4°C, washed and the remaining protein on beads was assessed by immunoblot. Dots represent individual experiments, n=4-7 for all experiments. *GAPDH* was used as a loading control gene for all qPCR experiments. Statistical analyses were performed using one-way ANOVA with multiple comparisons (H, I), and two-way ANOVA with multiple comparisons (J, K). \*p<0.05, \*\*p<0.01, \*\*\*p<0.001, \*\*\*\*p<0.0001; error bars represent S.E.M.

**Figure S7**

| Rank | Motif                                                                             | P-value | log P-value | % of Targets | % of Background |
|------|-----------------------------------------------------------------------------------|---------|-------------|--------------|-----------------|
| 1    |  | 1e-13   | -3.175e+01  | 21.40%       | 11.99%          |
| 2    |  | 1e-13   | -3.153e+01  | 21.89%       | 12.40%          |

**Figure S7. DDX39A binding motifs for host genes, Related to Figure 5.**

Frequency plot of two motifs identified by HOMER from DDX39A peaks in host transcripts. The “% of Targets” column indicates the % of DDX39A peaks containing the motif while the “% of Background” indicates the frequency of the motif in the background data.



**Figure S8**

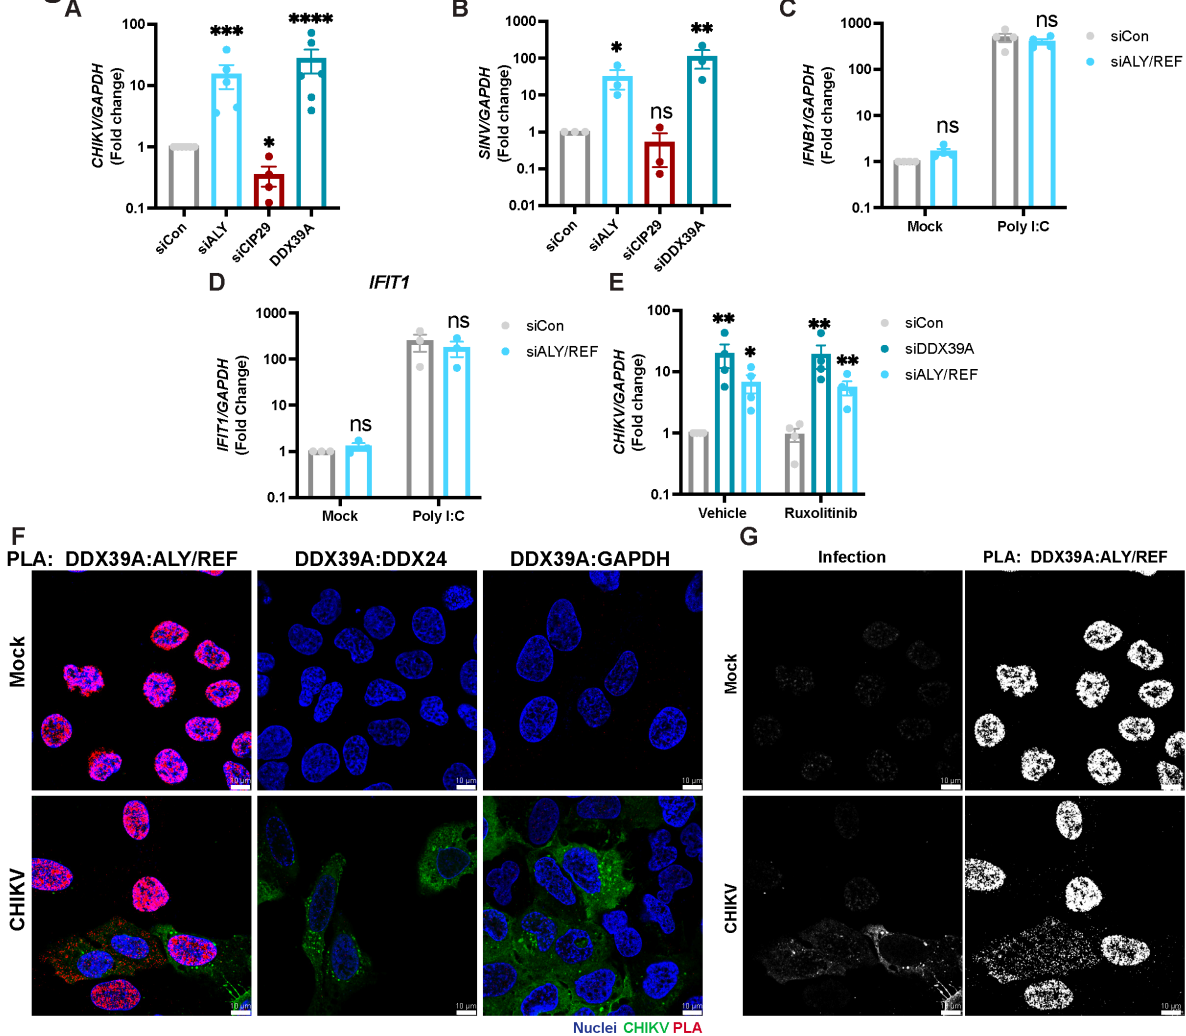

**Figure S8 ALY-REF is antiviral against alphaviruses and associates with DDX39A in CHIKV-infected cells, related to Figure 5.**

(A-B) Control and siRNA ALY/REF, CIP29, and DDX39A-depleted cells were infected with (A) CHIKV (MOI 0.5, 24h) and (B) SINV (MOI 0.1, 24h) and viral RNA was assessed by qPCR. (C-D) U2OS cells depleted of control and ALY/REF were transfected with either vehicle or poly (I:C) for 6-8h. Levels of (C) *IFNB1* and (D) *IFIT1* were assessed by qPCR. (E) U2OS cells depleted of control, ALY/REF, and DDX39A were pretreated with vehicle or Ruxolitinib, infected with CHIKV, and viral levels were quantified by qPCR. (F) Mock and CHIKV-infected U2OS cells were reacted with mouse and rabbit antibody pairs for DDX39A-ALY/REF, DDX39A-DDX24, and DDX39A-GAPDH and subjected to PLA by incubating with species specific PLA oligo probe tagged secondary antibodies, incubated with ligase and then amplification solution and fluorescently labeled oligonucleotides (red). Immunofluorescence with anti-CHIKV in red, and Hoechst (nuclei, blue) and cells were imaged with confocal microscopy, n=2. (G) Monochrome images of the left panel in F. Dots represent individual experiments, n=3-4 for all experiments. *GAPDH* was used as a loading control gene for all qPCR experiments. Statistical analyses were performed using one-way ANOVA with multiple comparisons (A, B), and two-way ANOVA with multiple comparisons (C, D, E). \*p<0.05, \*\*p<0.01, \*\*\*p<0.001, \*\*\*\*p<0.0001; error bars represent S.E.M.

**Table S1. DDX screen, Related to Figure 1**

| Library   | Gene Symbol            | Avg_Zscore_TotalCells | Avg_Zscore_%Positive |
|-----------|------------------------|-----------------------|----------------------|
| Dharmacon | <a href="#">DDX1</a>   | 0.476305476           | 0.007901562          |
| Dharmacon | <a href="#">DDX10</a>  | 0.140288395           | 0.481909761          |
| Dharmacon | <a href="#">DDX11</a>  | 0.275141847           | -0.087999637         |
| Dharmacon | <a href="#">DDX17</a>  | 0.268602189           | 0.077356883          |
| Dharmacon | <a href="#">DDX18</a>  | 0.144467879           | 0.432583584          |
| Dharmacon | <a href="#">DDX19A</a> | 0.431571327           | 0.140965862          |
| Dharmacon | <a href="#">DDX19B</a> | -0.290430039          | -1.587683848         |
| Dharmacon | <a href="#">DDX20</a>  | 0.353816206           | 0.174766974          |
| Dharmacon | <a href="#">DDX21</a>  | -0.26415485           | -0.154159864         |
| Dharmacon | <a href="#">DDX23</a>  | -0.617752506          | 0.551720292          |
| Dharmacon | <a href="#">DDX24</a>  | -0.665711             | -0.718320698         |
| Dharmacon | <a href="#">DDX25</a>  | -0.2194996            | 0.316121046          |
| Dharmacon | <a href="#">DDX27</a>  | 0.283469586           | 0.402196388          |
| Dharmacon | <a href="#">DDX28</a>  | 0.445365569           | -0.558207454         |
| Dharmacon | <a href="#">DDX31</a>  | 0.479725631           | 1.317873837          |
| Dharmacon | <a href="#">DDX39</a>  | 0.489242729           | 1.782054712          |
| Dharmacon | <a href="#">DDX39B</a> | -0.9894877            | 0.830854244          |
| Dharmacon | <a href="#">DDX3X</a>  | -0.39232888           | -1.157055802         |
| Dharmacon | <a href="#">DDX3Y</a>  | 0.330446311           | 0.852899203          |
| Dharmacon | <a href="#">DDX4</a>   | 0.383646361           | 0.157517763          |
| Dharmacon | <a href="#">DDX41</a>  | 0.064399568           | 0.030574769          |
| Dharmacon | <a href="#">DDX42</a>  | -0.037926794          | 0.953311183          |
| Dharmacon | <a href="#">DDX43</a>  | 0.667432892           | 1.928539232          |
| Dharmacon | <a href="#">DDX46</a>  | 0.35444086            | -0.218721897         |
| Dharmacon | <a href="#">DDX47</a>  | -0.081385288          | 0.02628907           |
| Dharmacon | <a href="#">DDX49</a>  | 0.109261701           | -0.147898261         |
| Dharmacon | <a href="#">DDX5</a>   | 0.0949275             | -0.203557624         |
| Dharmacon | <a href="#">DDX50</a>  | -0.344416672          | 2.866773293          |
| Dharmacon | <a href="#">DDX51</a>  | 0.42182489            | -0.671295785         |
| Dharmacon | <a href="#">DDX52</a>  | 0.433935195           | -0.294546657         |
| Dharmacon | <a href="#">DDX53</a>  | 0.290788719           | -0.131220705         |
| Dharmacon | <a href="#">DDX54</a>  | -0.134709836          | -0.569582148         |
| Dharmacon | <a href="#">DDX55</a>  | 0.540234637           | -0.353612599         |
| Dharmacon | <a href="#">DDX56</a>  | -0.174245021          | 0.074929715          |
| Dharmacon | <a href="#">DDX58</a>  | 0.436485602           | 0.343085721          |

|           |                        |              |              |
|-----------|------------------------|--------------|--------------|
| Dharmacon | <a href="#">DDX59</a>  | 0.319156887  | -0.889350625 |
| Dharmacon | <a href="#">DDX6</a>   | -0.565601073 | -0.844918108 |
| Dharmacon | <a href="#">DDX60</a>  | 0.337906675  | 0.536209938  |
| Dharmacon | <a href="#">DDX60L</a> | 0.39005483   | 0.59445078   |
| Dharmacon | <a href="#">EIF4A1</a> | -1.849566092 | -1.100473697 |
| Dharmacon | <a href="#">EIF4A2</a> | 0.313807285  | 0.232675397  |
| Dharmacon | <a href="#">EIF4A3</a> | -6.053321537 | -1.942119227 |

**Table S3. CHIKV genome annotations, Related to Figure 5**

| Genome     | Start | End   | Viral RNA/protein         |
|------------|-------|-------|---------------------------|
| AF490259.3 | 76    | 7497  | nonstructural polyprotein |
| AF490259.3 | 7566  | 11312 | structural polyprotein    |
| AF490259.3 | 1     | 75    | UTR                       |
| AF490259.3 | 76    | 1680  | nsP1                      |
| AF490259.3 | 1681  | 4074  | nsP2                      |
| AF490259.3 | 4075  | 5664  | nsP3                      |
| AF490259.3 | 5665  | 7497  | nsP4                      |
| AF490259.3 | 7566  | 8348  | C                         |
| AF490259.3 | 8349  | 8540  | E3                        |
| AF490259.3 | 8541  | 9809  | E2                        |
| AF490259.3 | 9810  | 9992  | 6K                        |
| AF490259.3 | 9993  | 11309 | E1                        |
| AF490259.3 | 11313 | 11812 | UTR                       |
| AF490259.3 | 1     | 11812 | genome                    |
| AF490259.3 | 1     | 11812 | antigenome                |
| AF490259.3 | 7498  | 11812 | subgenome                 |

| Genome name                                                 | Start | End   | Secondary RNA structure |
|-------------------------------------------------------------|-------|-------|-------------------------|
| AF490259.3                                                  | 70    | 156   | SLE                     |
| AF490259.3                                                  | 160   | 217   | 5'CSE                   |
| AF490259.3                                                  | 2501  | 3079  | Packaging signal        |
| AF490259.3                                                  | 5683  | 5754  | Opal read-through stem  |
| AF490259.3                                                  | 9943  | 10033 | Terminal frameshift     |
| based on structures from Madden and colleagues <sup>5</sup> |       |       |                         |

**Table S4. Recombinant virus sequences, Related to Figure 5**

| Virus strain | Mutant Name | Sequence range | Number mutations | Sequence                                                                                                                                                                       |
|--------------|-------------|----------------|------------------|--------------------------------------------------------------------------------------------------------------------------------------------------------------------------------|
| CHIKV 181/25 | WT          | 67-220         | 0                | ATAACCCATCATGGATTCTGTGTACGT<br>GGACATAGACGCTGACAGCGCCTTTTT<br>GAAGGCCCTGCAACGTGCGTACCCCA<br>TGTTTGAGGTGGAACCTAGGCAGGTCA<br>CATCGAATGACCATGCTAATGCTAGAG<br>CGTTCTCGCATCTAGCCATA |
| CHIKV 181/25 | ∂5'CSE      | 67-220         | 10               | ATAACCCATCATGGATTCTGTGTACGT<br>GGACATAGACGCTGACAGCGCCTTTTT<br>GAAGGCCCTGCAACGTGCGTACCCCA<br>TGTTTGAGGTGGAACCTAGGCAGGTCA<br>CATCTAACGACCATGCGAACGCCAGAG<br>CGTTTACCCACCTAGCTATA |
| CHIKV 181/25 | ∂SL3        | 67-220         | 11               | ATAACCCATCATGGATTCTGTGTATGT<br>GGACATTGATGCTGACAGCGCGTTCCT<br>CAAGGCGCTTCAACGTGCCTATCCCAT<br>GTTTGAGGTGGAACCTAGGCAGGTCA<br>CATCGAATGACCATGCTAATGCTAGAG<br>CGTTCTCGCATCTAGCCATA |

**Table S5. Oligonucleotides, Related to STAR Methods (Oligonucleotides section)**

| Oligonucleotides |                           |                           |        |
|------------------|---------------------------|---------------------------|--------|
| siRNA name       | Sense                     | Antisense                 | Source |
| DDX39A-1         | CAGGACCGGUUUGAAG<br>UUA   | UAACUCAAACCGGU<br>CCUG    | Sigma  |
| DDX39A-2         | GAGUCAACAUCGUCUU<br>UAA   | UAAAAGACGAUGUUG<br>ACUC   | Sigma  |
| DDX39B-1         | AGUUCAUGCAAGAUC<br>AAU    | AUUGGAUCUUGCAUG<br>AACU   | Sigma  |
| DDX39B-2         | CAGUACUACGUGAAAC<br>UGA   | UCAGUUUCACGUAGU<br>ACUG   | Sigma  |
| DDX39B-3         | AGCUACUAGUGGAGCA<br>GAA   | UUCUGCUCCACUAGU<br>AGCU   | Sigma  |
| ALY/REF-1        | CAUUCAGCUUGUCACG<br>UCA   | UGACGUGACAAGCUG<br>AAUG   | Sigma  |
| ALY/REF-2        | GGAACUCUUUGCUGAA<br>UUU   | AAAUUCAGCAAAGAGU<br>UCC   | Sigma  |
| CIP29-1          | UGGUGAAAUUACAUC<br>UGA    | UCAGAUGUAAUUUUC<br>ACCA   | Sigma  |
| CIP29-2          | GCAAGAUCUUAUCCACA<br>GA   | UCUGUGGAUAAGAUC<br>UUGC   | Sigma  |
| siFIT-1          | GAGAAAAGCUAGACAAA<br>AUTT | AUUUUGUCUAGCUUU<br>UCUCTG | Sigma  |
| siFIT-2          | GGCUGUCCGCUUAAAU<br>CCATT | UGGAUUUAAGCGGAC<br>AGCCTG | Sigma  |

|                         |                              |                                |                             |
|-------------------------|------------------------------|--------------------------------|-----------------------------|
| siCon                   |                              |                                | Lifetechnologies<br>#AM4613 |
| siDeath                 |                              |                                | Qiagen#1027299              |
| <b>qPCR Primer name</b> |                              |                                |                             |
|                         | <b>Forward</b>               | <b>Reverse</b>                 | <b>Source</b>               |
| CHIKV nsp2              | GGCAGTGGTCCCAGATA<br>ATCAAG  | ACTGTCTAGATCCACC<br>CCATACATG  | IDT                         |
| DDX39A                  | GAGCGAGTCAACATCGT<br>CTTTA   | AAGTGATGGCTAGGC<br>CTTTG       | IDT                         |
| IFIT1                   | CAACCAAGCAAATGTGA<br>GGA     | AGGGGAAGCAAAGAA<br>AATGG       | IDT                         |
| IFIT2                   | CACTGCAACCATGAGTG<br>AGAA    | AGTAGGTTGCACATTG<br>TGGCT      | IDT                         |
| IFIT3                   | AAAAGCCCAACAACCCA<br>GAAT    | CGTATTGGTTATCAGG<br>ACTCAGC    | IDT                         |
| IFIT5                   | GGGCTGGGGTCTCTCC<br>TTTA     | AATTTCACTCATGATG<br>GCAGCG     | IDT                         |
| IKBa                    | CTCCGAGACTTTCGAGG<br>AAATAC  | CCATTGTAGTTGGTAG<br>CCTTCA     | IDT                         |
| IRF7                    | GTGTGTCTTCCCTGGAT<br>AGC     | GGAGTTCTCATTAGAC<br>TGGGTTT    | IDT                         |
| IFNB1                   | CAACTTGCTTGGATTCC<br>TACAAAG | TATTC AAGCCTCCCAT<br>TCAATTG   | IDT                         |
| ALY/REF                 | GTGGAGACAGGTGGGA<br>AAC      | CCTTCTTCAGCGTTCC<br>AAATTC     | IDT                         |
| CIP29                   | GAAGTGAACACAGAG<br>GATAC     | CTGGAGAACAGAAAGT<br>ATCAGGAA   | IDT                         |
| GAPDH                   | ACCAAATCCGTTGACTC<br>CGACCTT | TCGACAGTCAGCCGC<br>ATCTTCTTT   | IDT                         |
| SINV nsp1               | GCTGAAACACCATCGCT<br>CTGCTTT | TGGTGTGGAAGCCAAT<br>CCAGTACA   | IDT                         |
| RVFV                    | CAAGCAGTGGACCGCA<br>ATGAGA   | GGGCTTGTTGCCACG<br>AGTTAGA     | IDT                         |
| 229E                    | TGGCGGGTGGGATAATA<br>TGT     | GAGGGCATAGCTCTAT<br>CACACTTAGG | IDT                         |
| OC43                    | CTATCTGGGAACAGGAC<br>CGC     | TTGGGTCCCGATCGAC<br>AATG       | IDT                         |
| ONNV                    | CGGCACTCTTCGCAAAA<br>ACA     | TCCTCGGTGTGCTTTG<br>TACC       | IDT                         |
| VSV                     | CGGAGGATTGACTAATG<br>C       | ACCATCCGAGCCATT<br>C           | IDT                         |
| VEEV                    | GTGTGACCAAATGACTG            | ACCGTTGACGACTATA<br>C          | IDT                         |
| DDX24                   | TTGACCCTGCATGCCTG<br>TAT     | AGGAATATCCAGACCC<br>CGAG       | IDT                         |
| TRAF3                   | CTCACAAGTGCAGCGTC<br>CAG     | GCTCCACTCCTTCAGC<br>AGGTT      | IDT                         |

|                                                          |                                                                                                                                                                      |                          |                               |
|----------------------------------------------------------|----------------------------------------------------------------------------------------------------------------------------------------------------------------------|--------------------------|-------------------------------|
| CHIKV (-)<br>antigenome<br>cDNA                          | GGCAGTATCGTGAATTC<br>GATGCCGCTGTACCGTC<br>CCCATTCC                                                                                                                   |                          | Meertens, et al. <sup>6</sup> |
| CHIKV (-)<br>antigenome<br>qPCR                          | GGCAGTATCGTGAATTC<br>GATGC                                                                                                                                           | ACTGCTGAGTCCAAAG<br>TGGG | Meertens, et al. <sup>6</sup> |
| gBlock<br>CHIKV Anti-<br>Genome<br>Amplicon<br>Standard: | GGCAGTATCGTGAATTC<br>GATGCCGCTGTACCGTC<br>CCCATTCCAGAACACAC<br>TACAGAAATGACTGGCA<br>GCAGCCACGAAAAGAAA<br>CTGCAACGTCACACAGA<br>TGAGGGAATTCACCACT<br>TTGGACTIONCAGCAGT |                          | Meertens, et al. <sup>6</sup> |

### Oligos for RNA synthesis

|                   | Forward                      | Reverse                        |            |
|-------------------|------------------------------|--------------------------------|------------|
| CHIKV-<br>Peak1   | ATGGCTGCGTGAGACAC<br>AC      | ACGTCTGCTCTCTGTC<br>TACAT      | This paper |
| CHIKV-<br>Peak2   | CGATGGTGTACAACGAA<br>AGAGA   | CCAACTCTTAGCCCA<br>ACAAAC      | This paper |
| CHIKV-<br>Peak3   | ATGGAGTTCATCCCAAC<br>CCA     | AGGTCGTACTIONTAGATG<br>ACCGC   | This paper |
| CHIKV-<br>Region1 | CTTCATCGGCGACGACA<br>ACA     | TAGGTAGCTGTAGTGC<br>GTACC      | This paper |
| MAVS              | GGGCTGTGTCTCCATC<br>T        | TTCTGCTGCTCCCGT<br>CA          | This paper |
| DDX24             | TCCCACGTACCTCGGAG<br>ATTTATG | GCA GAC TCG CTC<br>TTA CTT GGG | This paper |

### Oligos used in CLIP-Seq

| oligo name | IDENTIFIER/SEQUENCE                                                                  | SOURCE | REF.                                    |
|------------|--------------------------------------------------------------------------------------|--------|-----------------------------------------|
| RL5D       | /5InvddT/rArGrGrGrArGrGr<br>ArCrGrArUrGrCrGrGr(N1:2<br>5252525)r(N1)r(N1)r(N1)r<br>G | IDT    | Vourekas and<br>Mourelatos <sup>7</sup> |
| RL3(+P)    | /5Phos/rGrUrGrUrCrArGrU<br>rCrArCrUrUrCrCrArGrCrGr<br>G/3InvdT/                      | IDT    | Vourekas and<br>Mourelatos <sup>7</sup> |
| RL3(-P)    | rGrUrGrUrCrArGrUrCrArCr<br>UrUrCrCrArGrCrGrG/3Invd<br>T/                             | IDT    | Vourekas and<br>Mourelatos <sup>7</sup> |
| P3-*C*A*C  | CCGCTGGAAGTGACTIONGA<br>*C*A*C                                                       | IDT    | Vourekas and<br>Mourelatos <sup>7</sup> |
| DP5        | AGGGAGGACGATGCGG                                                                     | IDT    | Vourekas and<br>Mourelatos <sup>7</sup> |
| MSFP3      | CAAGCAGAAGACGGCAT<br>ACGAGATCCGCTGGAA<br>GTGACTIONGACAC                              | IDT    | Vourekas and<br>Mourelatos <sup>7</sup> |

|               |                                                                                                   |     |                                      |
|---------------|---------------------------------------------------------------------------------------------------|-----|--------------------------------------|
| Index primers | AATGATACGGCGACCAC<br>CGAGATCTACACTCTTT<br>CCCTACACGACGCTCTT<br>CCGATCT[index]AGGGA<br>GGACGATGCGG | IDT | Vourekas and Mourelatos <sup>7</sup> |
|               | (index sequences:<br>CTAG,GATC,CGTA,GCAT<br>,GTGC,ACCG,CATG,TGC<br>A,TCAC,AGTG,TACG,CC<br>GA)     |     |                                      |

### Supplemental References

1. Guzmán-Terán, C., Calderón-Rangel, A., Rodríguez-Morales, A., and Mattar, S. (2020). Venezuelan equine encephalitis virus: The problem is not over for tropical America. *Annals of clinical microbiology and antimicrobials* *19*, 1-8.
2. Mehta, R., Gerardin, P., de Brito, C.A.A., Soares, C.N., Ferreira, M.L.B., and Solomon, T. (2018). The neurological complications of chikungunya virus: A systematic review. *Reviews in medical virology* *28*, e1978.
3. Baxter, V.K., and Heise, M.T. (2020). Immunopathogenesis of alphaviruses. *Advances in virus research* *107*, 315-382.
4. Rezza, G., Chen, R., and Weaver, S.C. (2017). O'nyong-nyong fever: a neglected mosquito-borne viral disease. *Pathog Glob Health* *111*, 271-275. 10.1080/20477724.2017.1355431.
5. Madden, E.A., Plante, K.S., Morrison, C.R., Kutchko, K.M., Sanders, W., Long, K.M., Taft-Benz, S., Cisneros, M.C.C., White, A.M., Sarkar, S., et al. (2020). Using SHAPE-MaP To Model RNA Secondary Structure and Identify 3'UTR Variation in Chikungunya Virus. *Journal of Virology* *94*, e00701-00720. 10.1128/JVI.00701-20.
6. Meertens, L., Hafirassou, M.L., Couderc, T., Bonnet-Madin, L., Kril, V., Kümmerer, B.M., Labeau, A., Brugier, A., Simon-Lorier, E., and Burlaud-Gaillard, J. (2019). FHL1 is a major host factor for chikungunya virus infection. *Nature* *574*, 259-263.
7. Vourekas, A., and Mourelatos, Z. (2014). HITS-CLIP (CLIP-Seq) for mouse Piwi proteins. In *PIWI-Interacting RNAs*, (Springer), pp. 73-95.
